# Supplementary material for: Betulin Sulfonamides as Carbonic Anhydrase Inhibitors and Anticancer Agents in Breast Cancer Cells
Source: MDPI journal article supplement (doi:10.3390/ijms22168808), 2021-08-16
Supplement: s1 [file s1]

## Supplementary Files

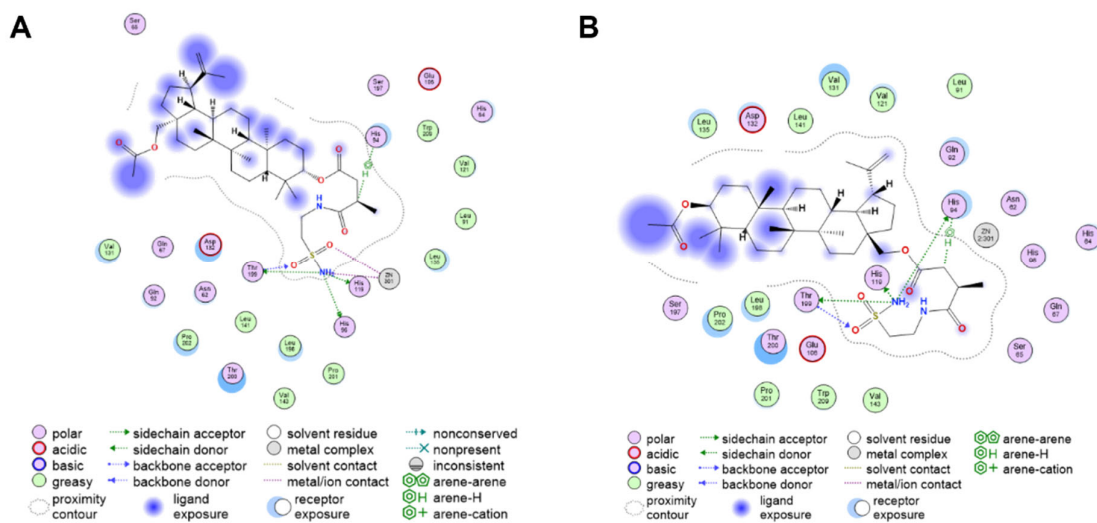

**Supplementary Figure S1.** Ligand interaction diagram [1]. It was generated with MOE 2020 (Molecular Operating Environment, 2018; Chemical Computing Group ULC, 1010 Sherbrooke St. West, Suite #910, Montreal, QC, Canada, H3A 2R7) illustrating the interactions of the betulin derivatives 13b (**A**) and 15b (**B**) with the active site residues of CA IX.

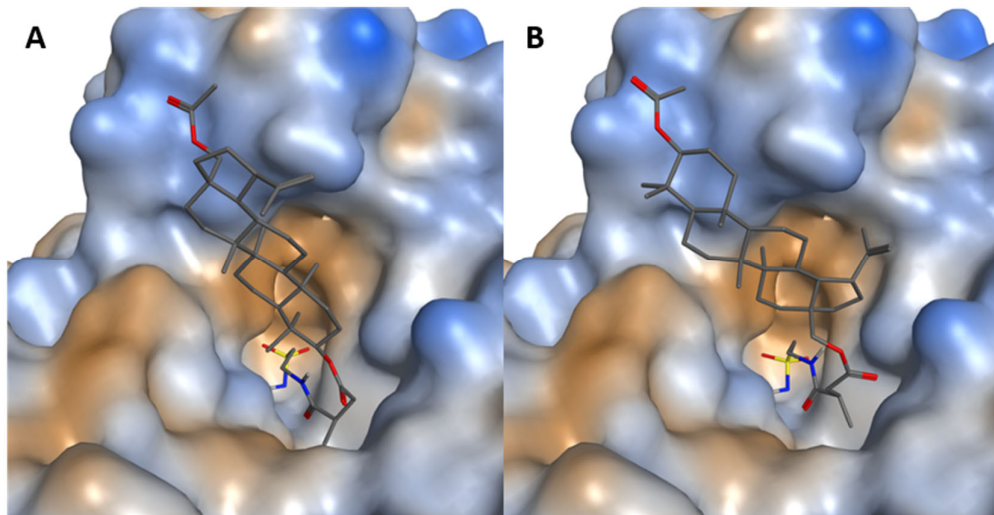

**Supplementary Figure S2.** Illustration of possible docking poses for 13b (**A**) and 15b (**B**) in the binding pocket CA XII (PDB code: 1jd0). The orientation of the enzyme is consistent with that of CA IX in Figure 7 of the main section. It can be seen that the orientation of the two inhibitors in the binding pockets is very similar. The binding pocket of CA XII is colored as a molecular surface according to lipophilicity (brown: lipophilic, blue: hydrophilic, white: neutral).

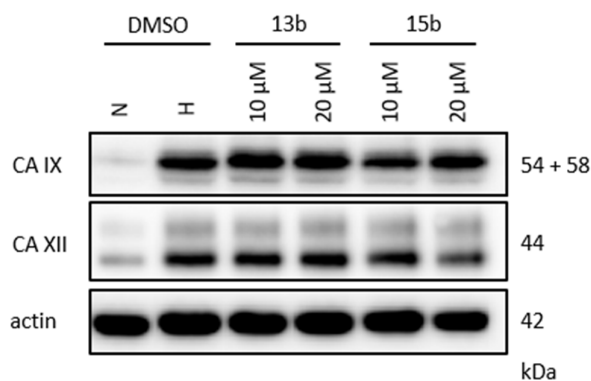

**Supplementary Figure S3.** Western blots of CA IX and CA XII. HS578T breast cancer cells were cultured under hypoxic conditions (0.1 % O<sub>2</sub>) and were subsequently treated with 10 μM and 20 μM 13b and 15b for 3 h. The cell lysates were analyzed by Western blot and the protein levels of CA IX and CA XII were examined. Actin was used as a loading control. The figure shows one representative Western blots of four independent experiments.

**Supplementary Table S1.** Total ChemPLP fitness values of the docked ligands 13b and 15b [2]. The score values represent an empirical fitness function optimized for pose predictions of the GOLD molecular docking program. The values given are dimensionless and higher values indicate higher predictive power.

|                  | <b>13b</b> | <b>15b</b> |
|------------------|------------|------------|
| Gold.PLP.Fitness | 65.5       | 82.7       |

## References

1. Clark, A.M.; Labute, P. 2D depiction of protein-ligand complexes. *Journal of Chemical Information and Modeling* **2007**, *47*, 1933–1944, doi:10.1021/ci7001473.
2. Korb, O.; Stützel, T.; Exner, T.E. Empirical scoring functions for advanced protein-ligand docking with PLANTS. *Journal of Chemical Information and Modeling* **2009**, *49*, 84–96, doi:10.1021/ci800298z.
